# Supplementary material
Source: MDPI journal article supplement (https://www.mdpi.com/2072-4292/12/6/1024)

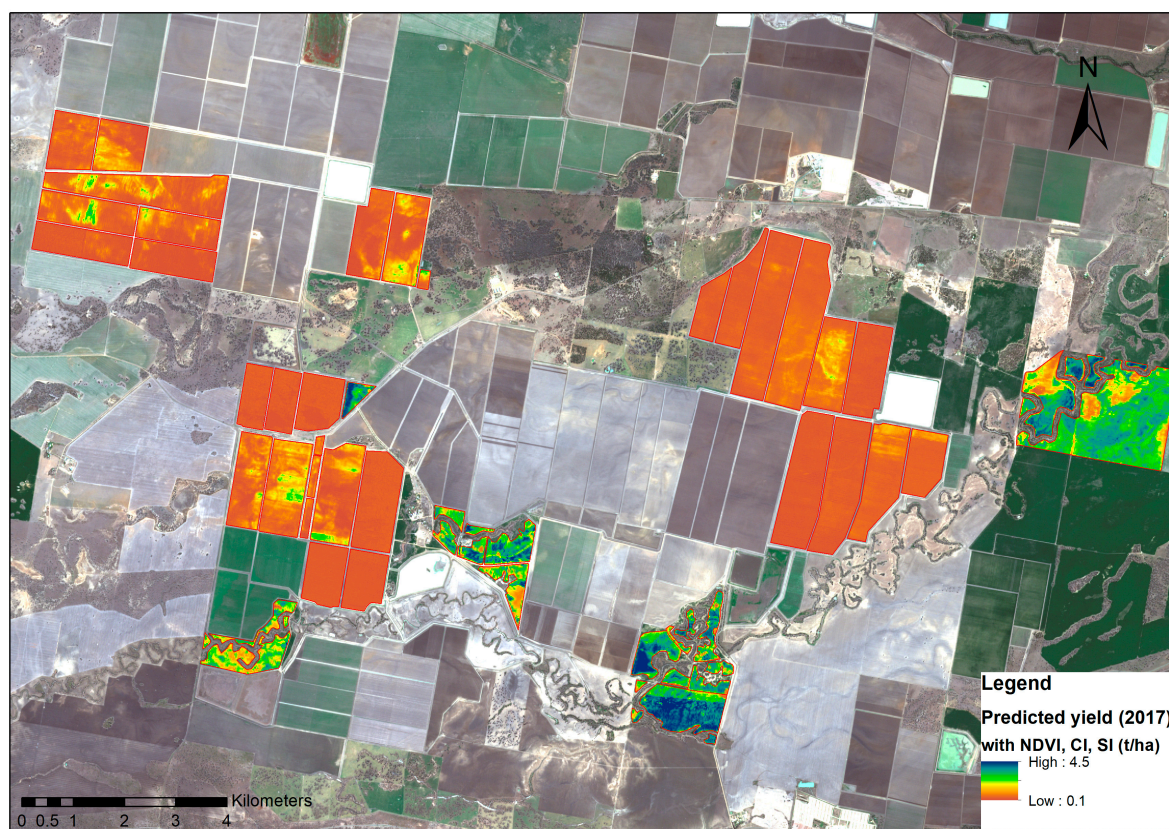

Figure S1. Applying the field scale yield model to pixels within each wheat field in the 2017 season.

Supplement: s1 [file s1]
